# Supplementary material for: Comparison of Associations Between Glucocorticoids Treatment and Mortality in COVID-19 Patients and SARS Patients: A Systematic Review and Meta-Analysis
Source: Research Square preprint supplement (doi:10.21203/rs.3.rs-125423/v1), 2020-12-11

Supplementary Figure 18. Forest Plot of All-Cause Mortality of Trials or Observational Studies Evaluating Glucocorticoids for COVID-19 Within Subgroups Defined by Characteristics of Patient, Disease Severity and Administration of Glucocorticoids among Studies Reporting Incidence of Events in Control from 5% to 10%

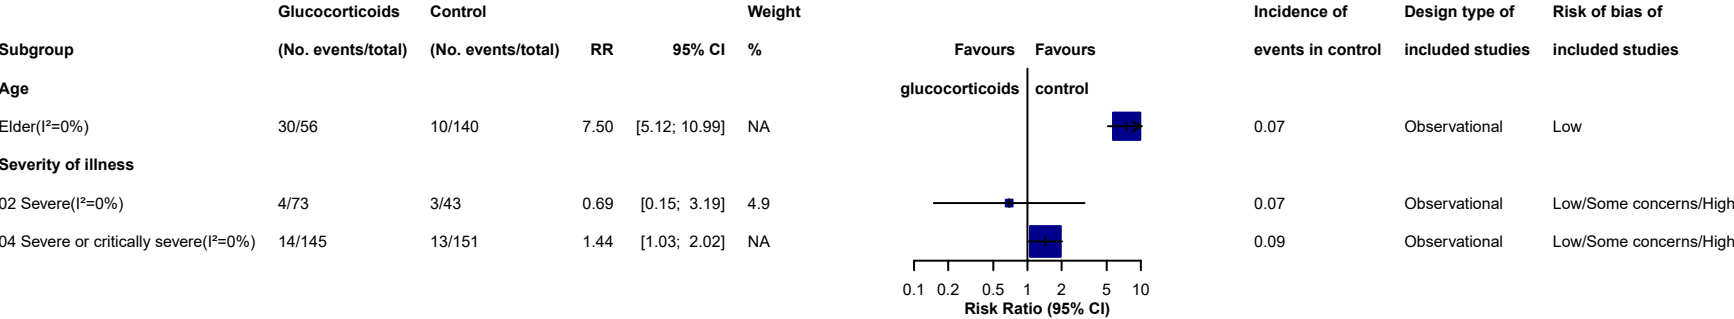

Supplement: Supplementary file 1 [file 1baa7bbc4a6ec64763763e89.pdf]
