# Supplementary material for: Comparison of Associations Between Glucocorticoids Treatment and Mortality in COVID-19 Patients and SARS Patients: A Systematic Review and Meta-Analysis
Source: Research Square preprint supplement (doi:10.21203/rs.3.rs-125423/v1), 2020-12-11

Supplementary Figure 2. Risk of Bias Graph for Each Item Risk of Bias Presented as Percentages across All Included RCTs

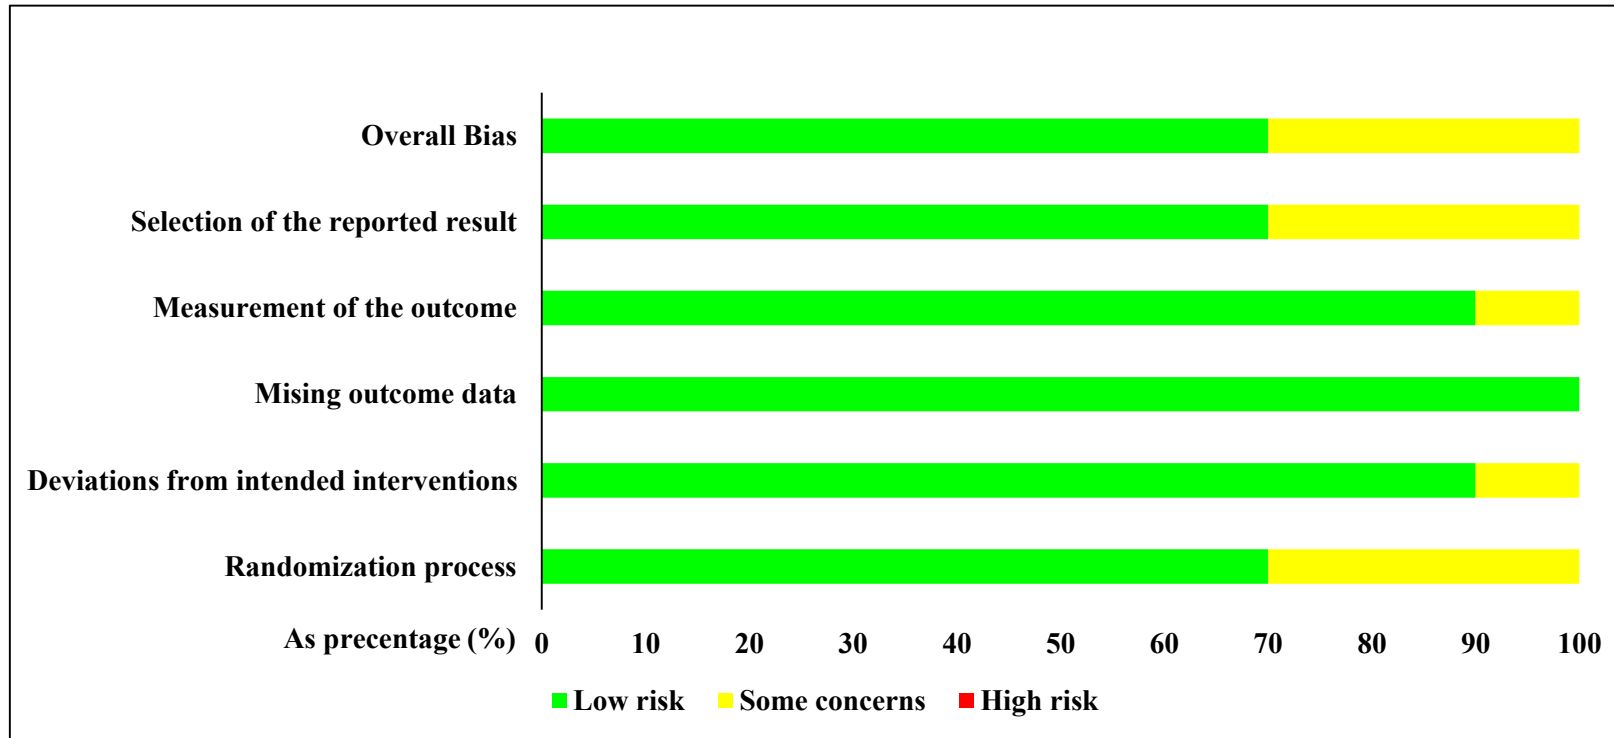

Supplement: Supplementary file 2 [file 22a03060d86c3b3988321549.pdf]
