# Supplementary material for: Comparison of Associations Between Glucocorticoids Treatment and Mortality in COVID-19 Patients and SARS Patients: A Systematic Review and Meta-Analysis
Source: Research Square preprint supplement (doi:10.21203/rs.3.rs-125423/v1), 2020-12-11

Supplementary Figure 13. Funnel Plot of All-Cause-Mortality-Including Composite Outcome of RCTs Evaluating Glucocorticoids for COVID-19

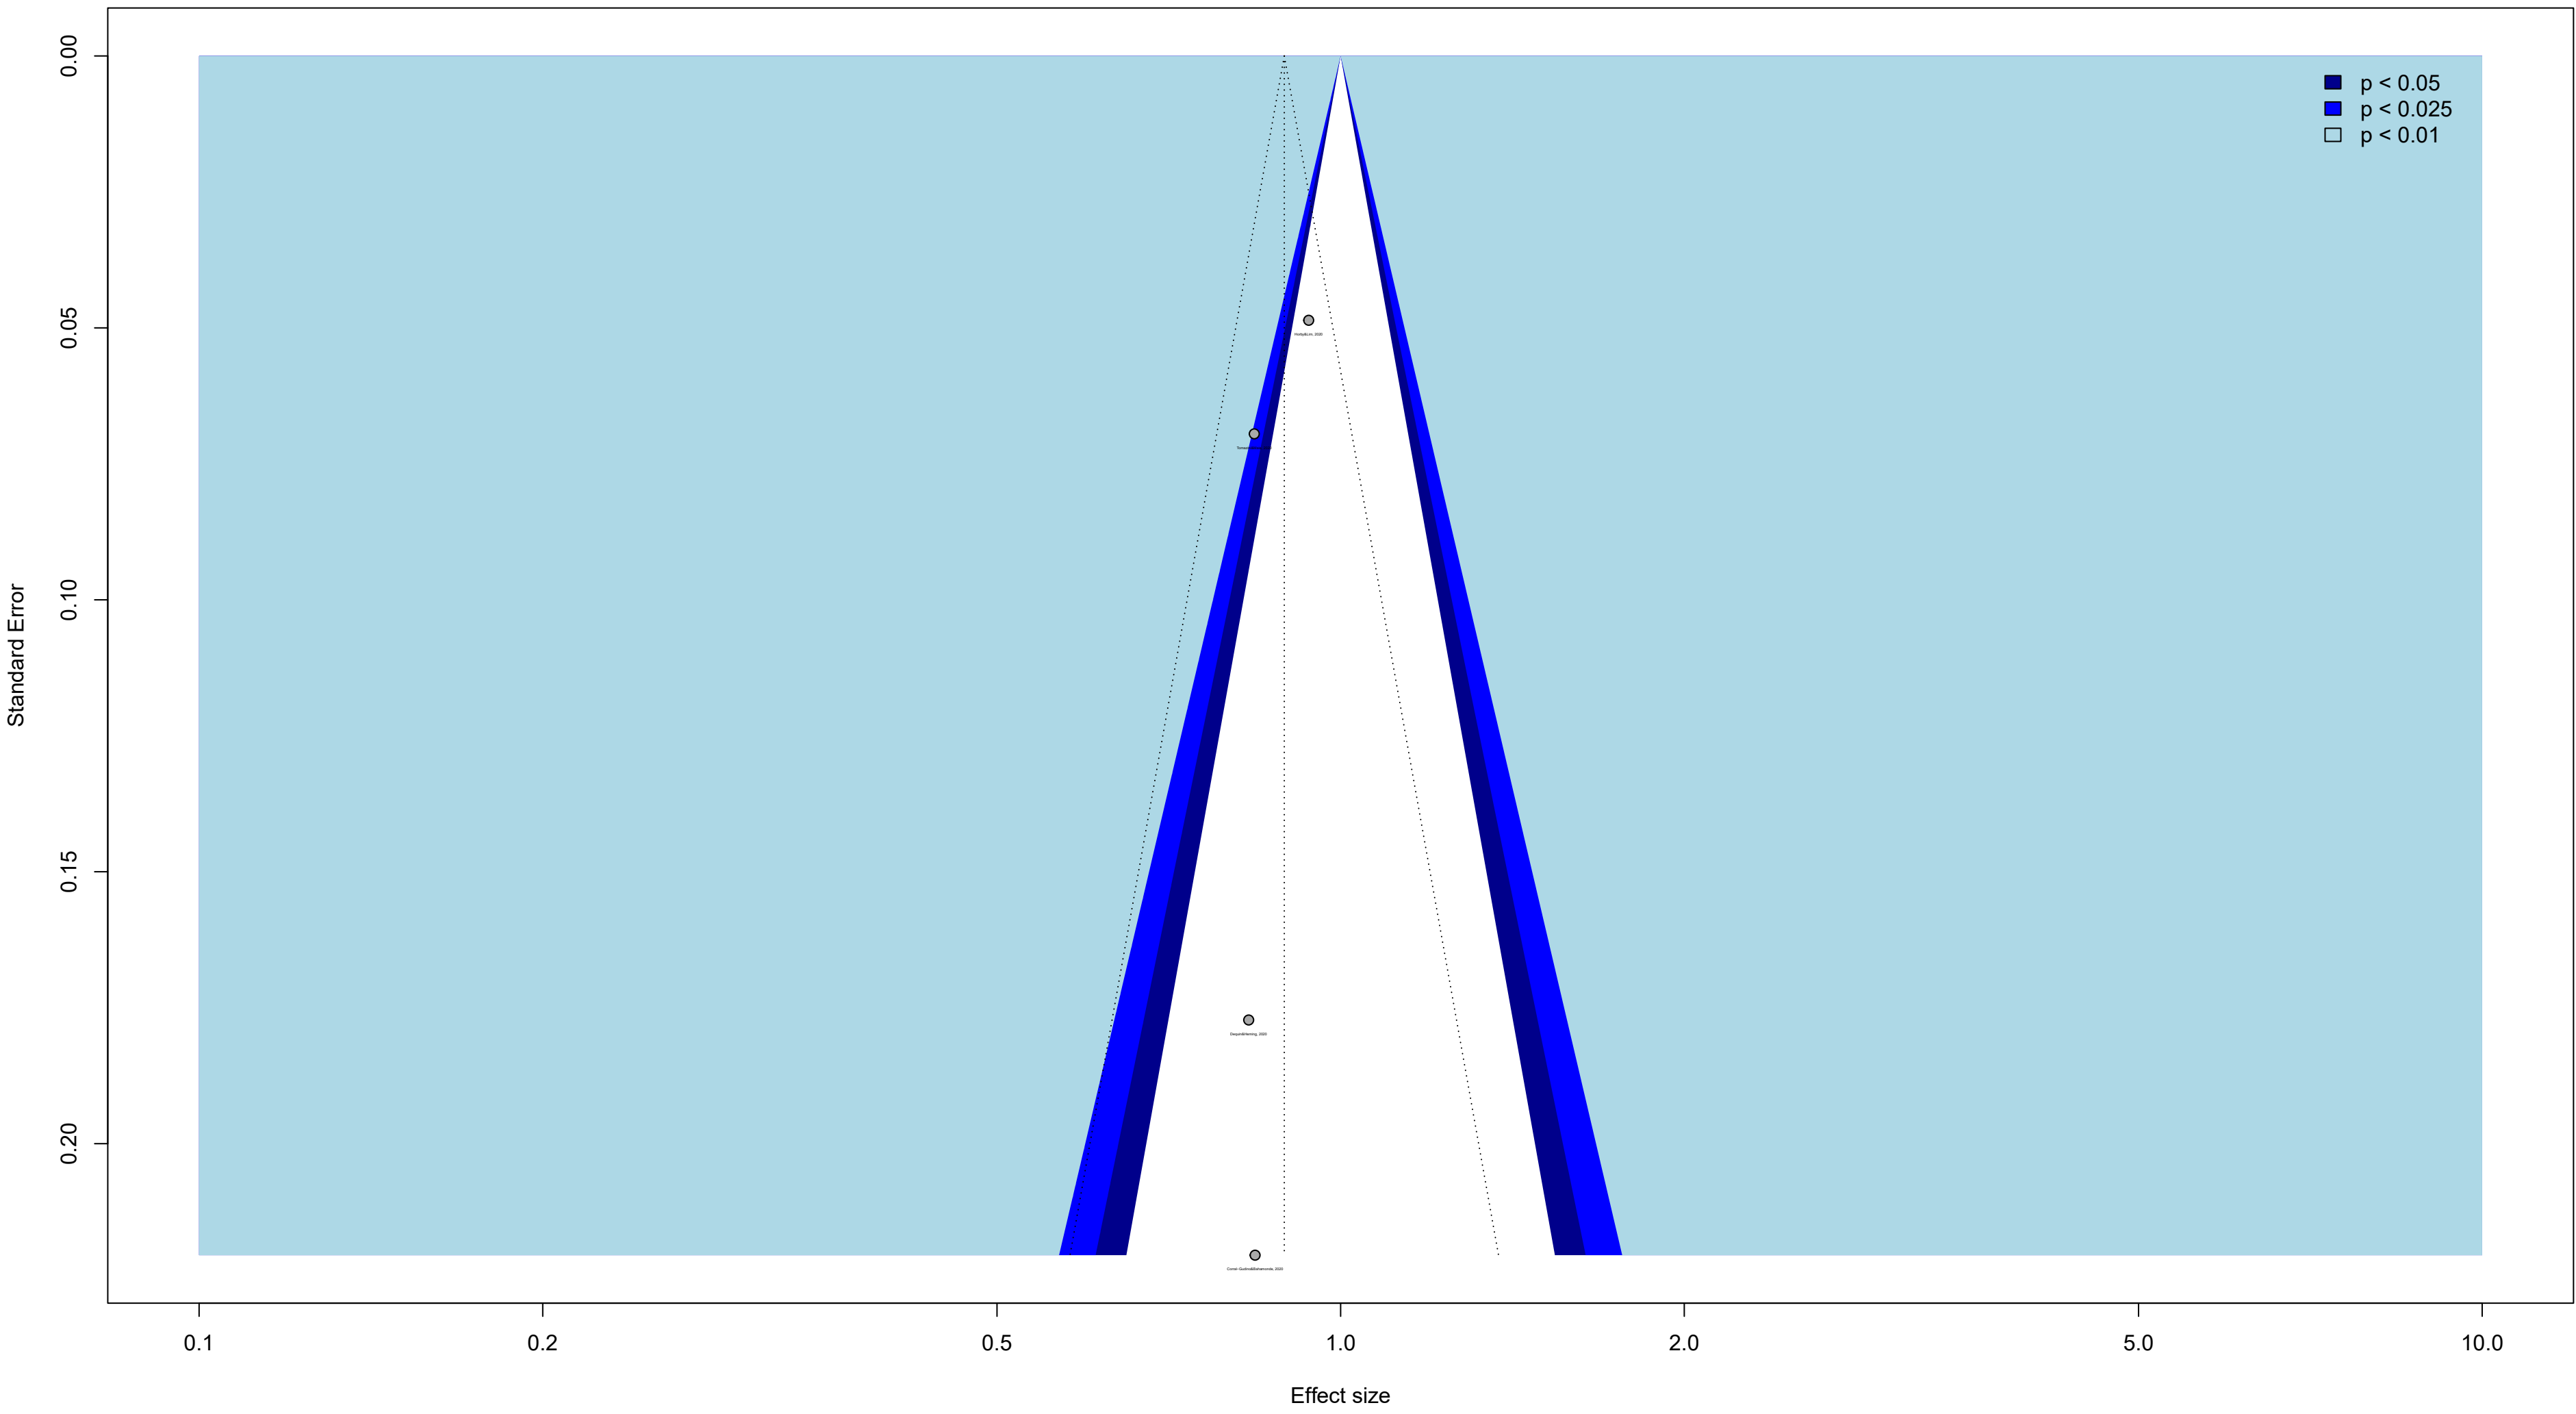

Supplement: Supplementary file 3 [file 265eb04b7ce9b2bfac10f23b.pdf]
