# Supplementary material for: Comparison of Associations Between Glucocorticoids Treatment and Mortality in COVID-19 Patients and SARS Patients: A Systematic Review and Meta-Analysis
Source: Research Square preprint supplement (doi:10.21203/rs.3.rs-125423/v1), 2020-12-11

Supplementary Figure 22. Forest Plot of All-Cause-Mortality-Including Composite Outcome of Trials or Observational Studies Evaluating Glucocorticoids for COVID-19 Within Subgroups Defined by Characteristics of Patient, Disease Severity and Administration of Glucocorticoids among Studies Reporting Incidence of Events in Control from 20% to 40%

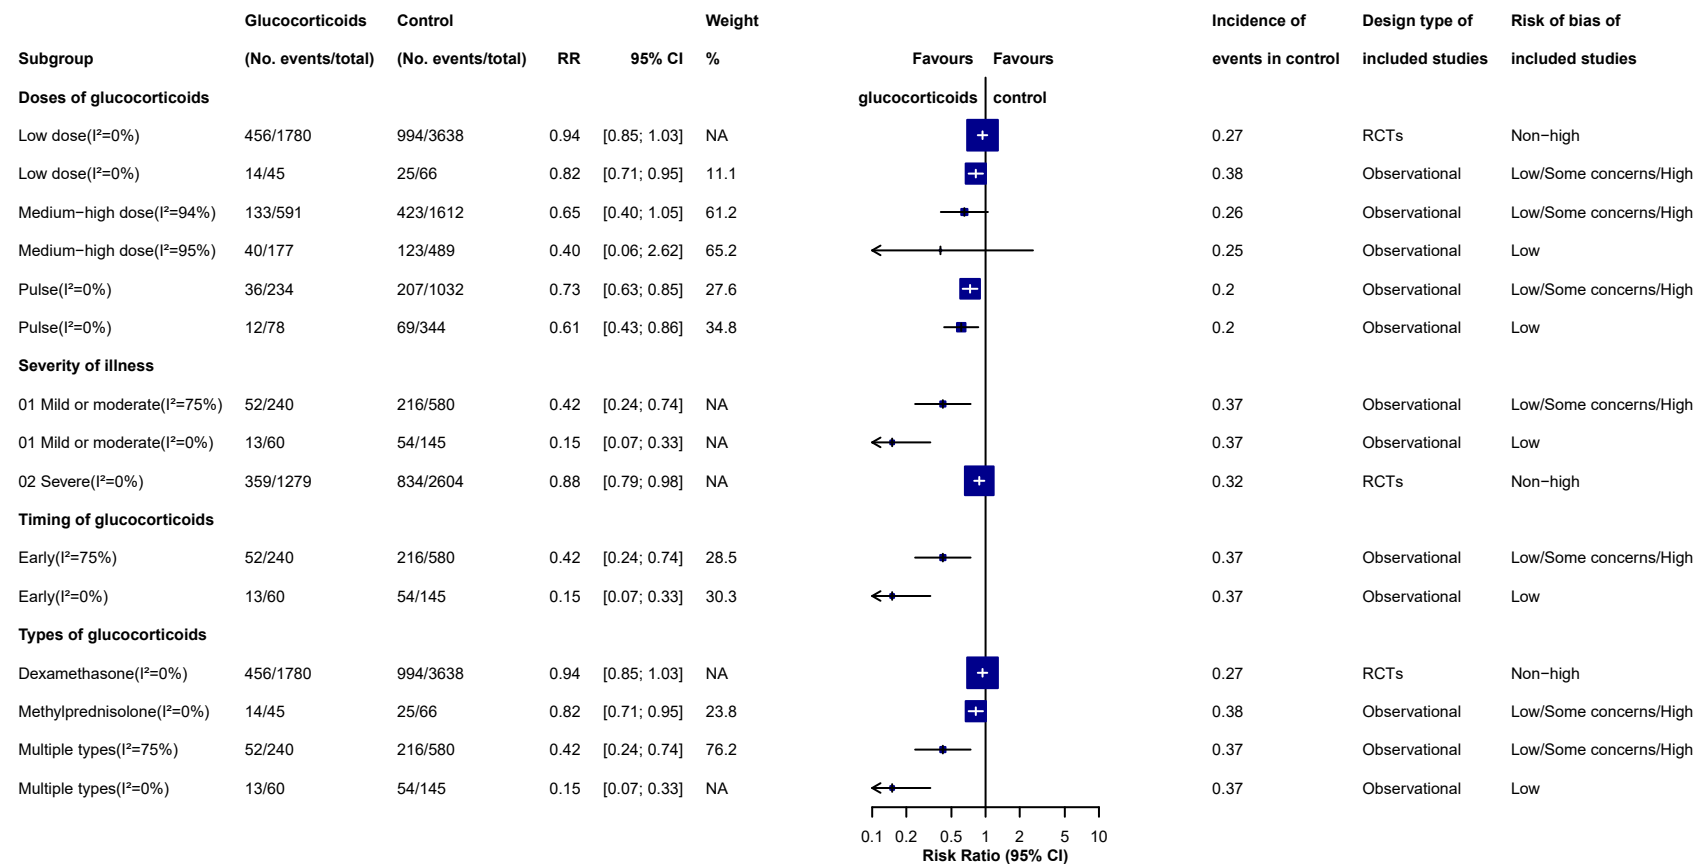

Supplement: Supplementary file 4 [file 81b343de28ff4f85c4641b11.pdf]
