# Supplementary material for: Comparison of Associations Between Glucocorticoids Treatment and Mortality in COVID-19 Patients and SARS Patients: A Systematic Review and Meta-Analysis
Source: Research Square preprint supplement (doi:10.21203/rs.3.rs-125423/v1), 2020-12-11

Supplementary Figure 21. Forest Plot of All-Cause Mortality of Trials or Observational Studies Evaluating Glucocorticoids for COVID-19 Within Subgroups Defined by Characteristics of Patient, Disease Severity and Administration of Glucocorticoids among Studies Reporting Incidence of Events in Control from 40% to 80%

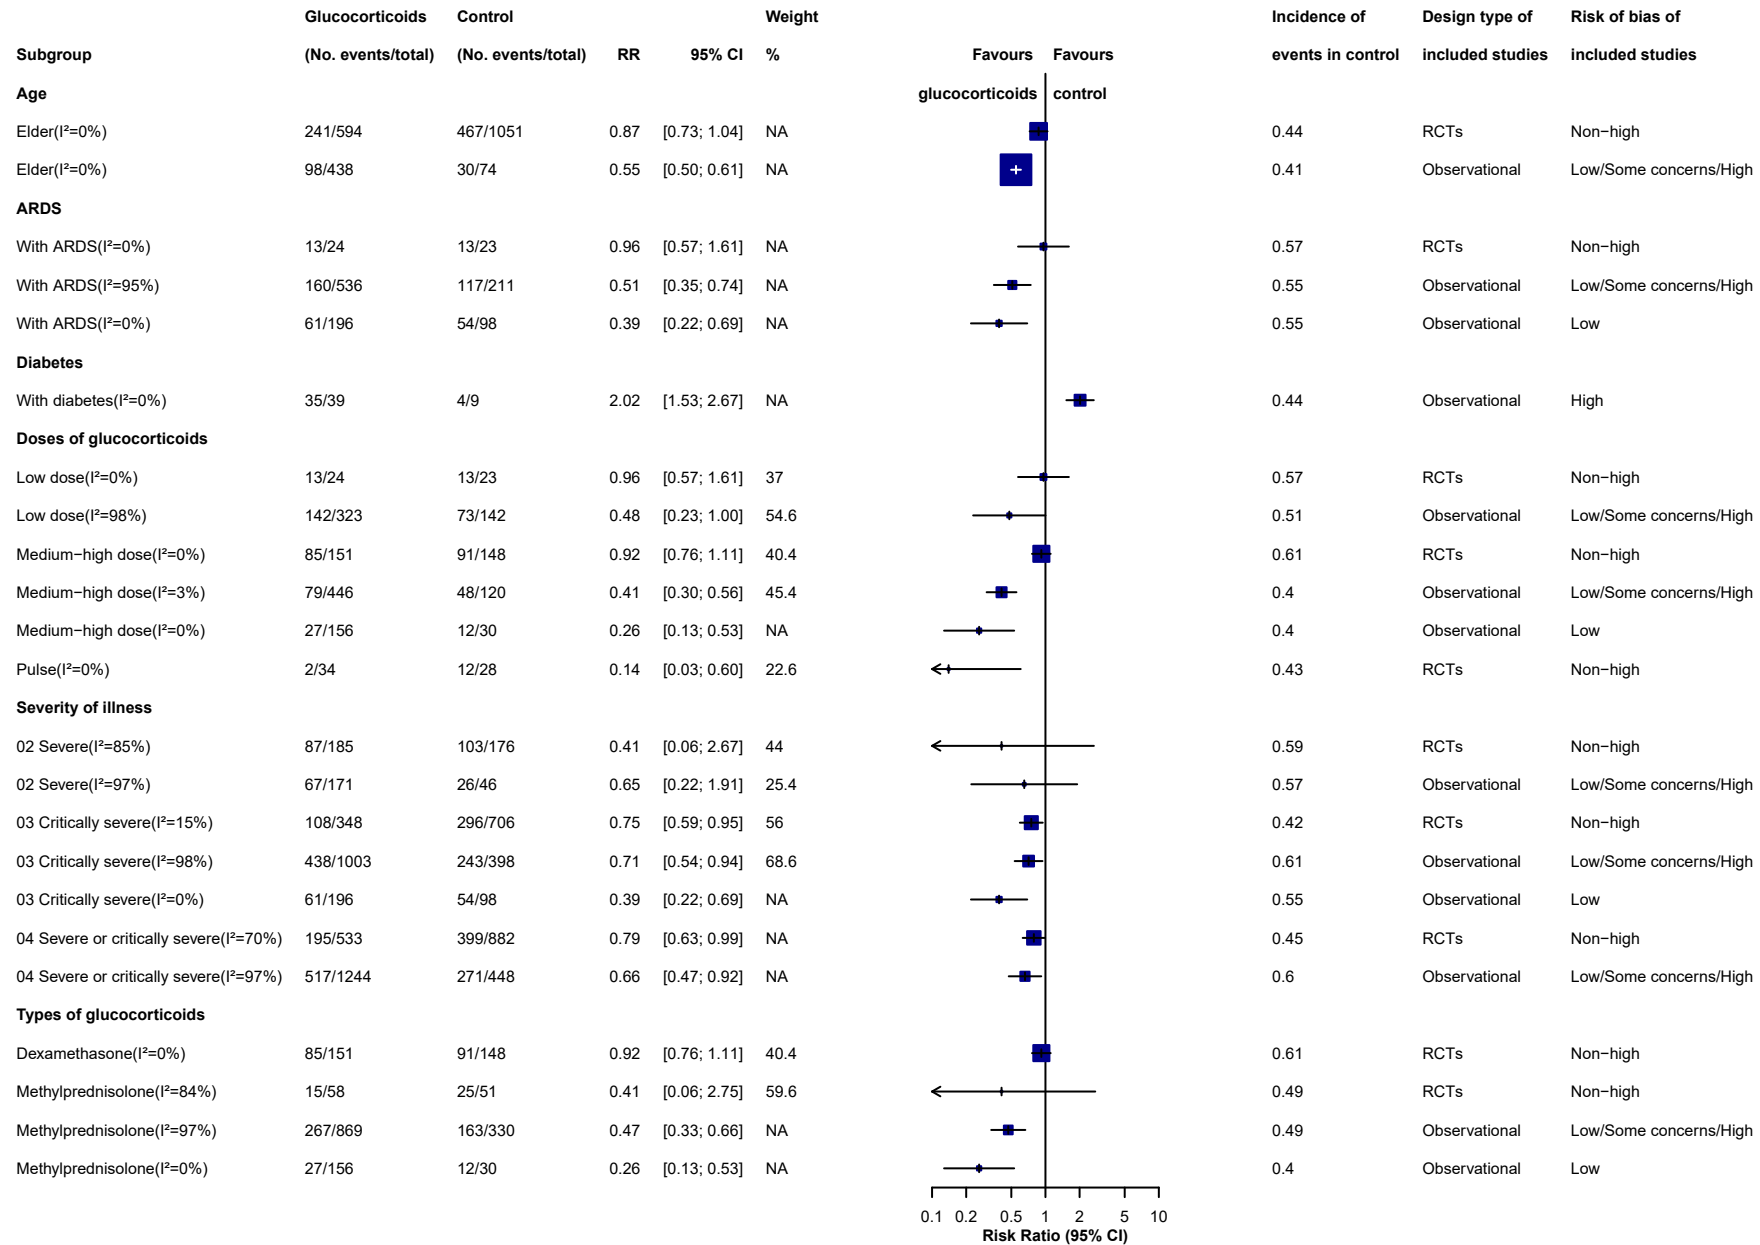

Supplement: Supplementary file 5 [file a8549efae90288534f2bfcd4.pdf]
